# Supplementary material for: Dissolved organic carbon mobilized from organic horizons of mature and harvested black spruce plots in a mesic boreal region
Source: Copernicus journal article supplement (doi:10.5194/bg-2018-516), 2019-01-10
Supplement: Supplementary file 1 [file bg-2018-516-supplement.pdf]

**Table S1.** Results of repeated measure linear mixed models assessing the effects of plot type, collection day and the interactive effect of collection day and plot type (forest and harvested) on temporal variations in lysimeter captured dissolved organic carbon (DOC) fluxes, water fluxes and DOC concentration. P-values shown with significant results in bold (alpha = 0.05). Post hoc least squares means tests used to determine significant differences between plot type shown in Figure 1D-F (asterisks)

|                                                                 | df | F value | p-value           |
|-----------------------------------------------------------------|----|---------|-------------------|
| <b>A. DOC flux <math>\text{g C m}^{-2} \text{d}^{-1}</math></b> |    |         |                   |
| plot type                                                       | 1  | 3.88    | 0.0616            |
| collection day                                                  | 29 | 23.49   | <b>&lt;0.0001</b> |
| plot type x collection day                                      | 29 | 1.51    | <b>0.0183</b>     |
| <b>B. Water flux <math>\text{L m}^{-2} \text{d}^{-1}</math></b> |    |         |                   |
| plot type                                                       | 1  | 4.98    | <b>0.0361</b>     |
| collection day                                                  | 29 | 26.71   | <b>&lt;0.0001</b> |
| plot type x collection day                                      | 29 | 2.36    | <b>0.0004</b>     |
| <b>C. [DOC] <math>\text{mg L}^{-1}</math></b>                   |    |         |                   |
| plot type                                                       | 1  | 7.27    | <b>0.0132</b>     |
| collection day                                                  | 24 | 48.45   | <b>&lt;0.0001</b> |
| plot type x collection day                                      | 24 | 2.90    | <b>&lt;0.0001</b> |

**Table S2.** Results of one way plot nested ANOVAs assessing the effects of plot type on annual lysimeter captured dissolved organic carbon (DOC) fluxes, water fluxes and DOC concentration. P-values shown with significant results in bold (alpha = 0.05). Plot type differences shown in Figure 2A-C (asterisks).

|                                       | df | F value | p-value       |
|---------------------------------------|----|---------|---------------|
| <b>A. DOC flux g C m<sup>-2</sup></b> |    |         |               |
| plot type                             | 1  | 23.49   | <b>0.0084</b> |
| <b>B. Water flux L m<sup>-2</sup></b> |    |         |               |
| plot type                             | 1  | 10.07   | <b>0.0337</b> |
| <b>C. [DOC] mg L<sup>-1</sup></b>     |    |         |               |
| plot type                             | 1  | 7.27    | 0.0903        |

**Table S3.** Linear mixed effects model results examining the effects of plot type, sample year (2013, 2014, 2015), and their interaction on soil respiration.  $\alpha = 0.05$

---

| <b>Source</b>    | <b>DF</b> | <b>F</b> | <b>p-value</b>    |
|------------------|-----------|----------|-------------------|
| Plot type        | 1         | 4.79     | 0.0721            |
| Year             | 2         | 87.28    | <b>&lt;0.0001</b> |
| Year x Plot type | 2         | 5.13     | <b>0.0060</b>     |

---

**Table S4.** Least square means for multiple comparisons of soil respiration ( $\text{CO}_2 \text{ m}^{-2} \text{ s}^{-1}$ ) in black spruce forests across plot type (harvested and forest) and sample years (2013–2015). Soil respiration was measured during the snow-free growing season.  $\alpha = 0.05$

| <b>Treatment_Year</b> |                       | <b>Mean</b>  | <b>Std.</b>  | <b>DF</b> | <b>t</b> | <b>p-value</b>   |
|-----------------------|-----------------------|--------------|--------------|-----------|----------|------------------|
|                       |                       | <b>Diff.</b> | <b>Error</b> |           |          |                  |
| Forest_2013           | Harvested_2013        | -0.465       | 1.488        | 2148      | -0.31    | 0.7546           |
|                       | <b>Forest_2014</b>    | -7.227       | 0.898        | 2148      | -8.05    | <b>&lt;.0001</b> |
|                       | <b>Forest_2015</b>    | -8.562       | 0.922        | 2148      | -9.28    | <b>&lt;.0001</b> |
| Harvested_2013        | Harvested_2014        | -1.337       | 0.898        | 2148      | -1.49    | 0.1366           |
|                       | <b>Harvested_2015</b> | -3.741       | 0.922        | 2148      | -4.06    | <b>&lt;.0001</b> |
| Forest_2014           | <b>Harvested_2014</b> | 5.424        | 1.524        | 2148      | 3.56     | <b>0.0004</b>    |
|                       | Forest_2015           | -1.334       | 0.953        | 2148      | -1.40    | 0.1619           |
| Harvested_2014        | <b>Harvested_2015</b> | -2.403       | 0.953        | 2148      | -2.52    | <b>0.0118</b>    |
| Forest_2015           | <b>Harvested_2015</b> | 4.355        | 1.552        | 2148      | 2.81     | <b>0.0051</b>    |

**Table S5.** Mean cumulative soil respiration ( $R_s$ ) for the snow-free growing season in 4 harvested plots and 4 forest plots. N refers to number of plot scale replicates. Values connected by the same letter are not significantly different determined by lsmeans tests shown in table S4 .

| <b>Treatment</b> | <b>Year</b> | <b>N</b> | <b><math>R_s</math><br/>(Mg C ha<sup>1</sup>)</b> |
|------------------|-------------|----------|---------------------------------------------------|
| <b>Forest</b>    | <b>2013</b> | 4        | 6.06 ± 0.41 <sup>a</sup>                          |
|                  | <b>2014</b> | 4        | 7.14 ± 0.55 <sup>bc</sup>                         |
|                  | <b>2015</b> | 4        | 7.85 ± 0.59 <sup>c</sup>                          |
| <b>Harvested</b> | <b>2013</b> | 4        | 5.53 ± 0.32 <sup>a</sup>                          |
|                  | <b>2014</b> | 4        | 6.20 ± 0.27 <sup>a</sup>                          |
|                  | <b>2015</b> | 4        | 6.49 ± 0.29 <sup>b</sup>                          |

**Table S6.** Regression analysis among soil respiration,  $R_s$  ( $\mu\text{mol CO}_2 \text{ m}^{-2} \text{ s}^{-1}$ ), soil temperature,  $T_s$  ( $^{\circ}\text{C}$ ), and soil moisture content,  $M_s$  ( $\text{m}^3/\text{m}^3$ ), and  $T_s \times M_s$  interactions in the harvested and forest plots.  $R_s$ ,  $T_s$ , and  $WC_s$  were measured concurrently at biweekly interval during the snow free season (May 1–Nov 30) from 2013–2015.  $\alpha = 0.05$

| <b>Plot type</b> | <b>Variable</b>  | <b>DF</b> | <b>Parameter Estimate</b> | <b>Standard Error</b> | <b>t</b> | <b>p-value</b> |
|------------------|------------------|-----------|---------------------------|-----------------------|----------|----------------|
| <b>Forest</b>    | Intercept        | 1         | 0.986                     | 0.579                 | 1.7      | 0.0892         |
|                  | $T_s$            | 1         | 0.278                     | 0.055                 | 5.08     | <.0001         |
|                  | $M_s$            | 1         | -0.037                    | 0.019                 | -1.93    | <b>0.0544</b>  |
|                  | $T_s \times M_s$ | 1         | 0.004                     | 0.002                 | 2.17     | <b>0.0306</b>  |
| <b>Harvested</b> | Intercept        | 1         | 1.543                     | 0.432                 | 3.57     | 0.0004         |
|                  | $T_s$            | 1         | 0.145                     | 0.032                 | 4.60     | <.0001         |
|                  | $M_s$            | 1         | -0.071                    | 0.014                 | -4.99    | <.0001         |
|                  | $T_s \times M_s$ | 1         | 0.006                     | 0.001                 | 5.58     | <.0001         |

**Table S7.** Hydraulic properties of O horizons collected from forest and harvested plots. Measurements were made using a automated HYPROP system, providing volumetric water content of the soil at initial saturation and field capacity. See methods for further measurement details.

| Water Content (% volume) |         |                            |
|--------------------------|---------|----------------------------|
|                          | Initial | Field Capacity<br>at 33kPa |
| <b>Harvested</b>         |         |                            |
| 1                        | 58.4    | 14.1                       |
| 2                        | 62.1    | 18.6                       |
| 3                        | 76.3    | 23.1                       |
| 4                        | 76.2    | 21.0                       |
| <b>Forest</b>            |         |                            |
| 1                        | 67.8    | 18.2                       |
| 2                        | 75      | 19.3                       |
| 3                        | 77.5    | 17.4                       |
| 4                        | 77.1    | 12.8                       |
